# Supplementary material for: Complete plastome sequencing of both living species of Circaeasteraceae (Ranunculales) reveals unusual rearrangements and the loss of the ndh gene family
Source: PubMed Central journal article supplement (PMC5551029; doi:10.1186/s12864-017-3956-3), 2017-08-09
Supplement: 12864_2017_3956_MOESM7_ESM.pdf [file 12864_2017_3956_MOESM7_ESM.pdf]

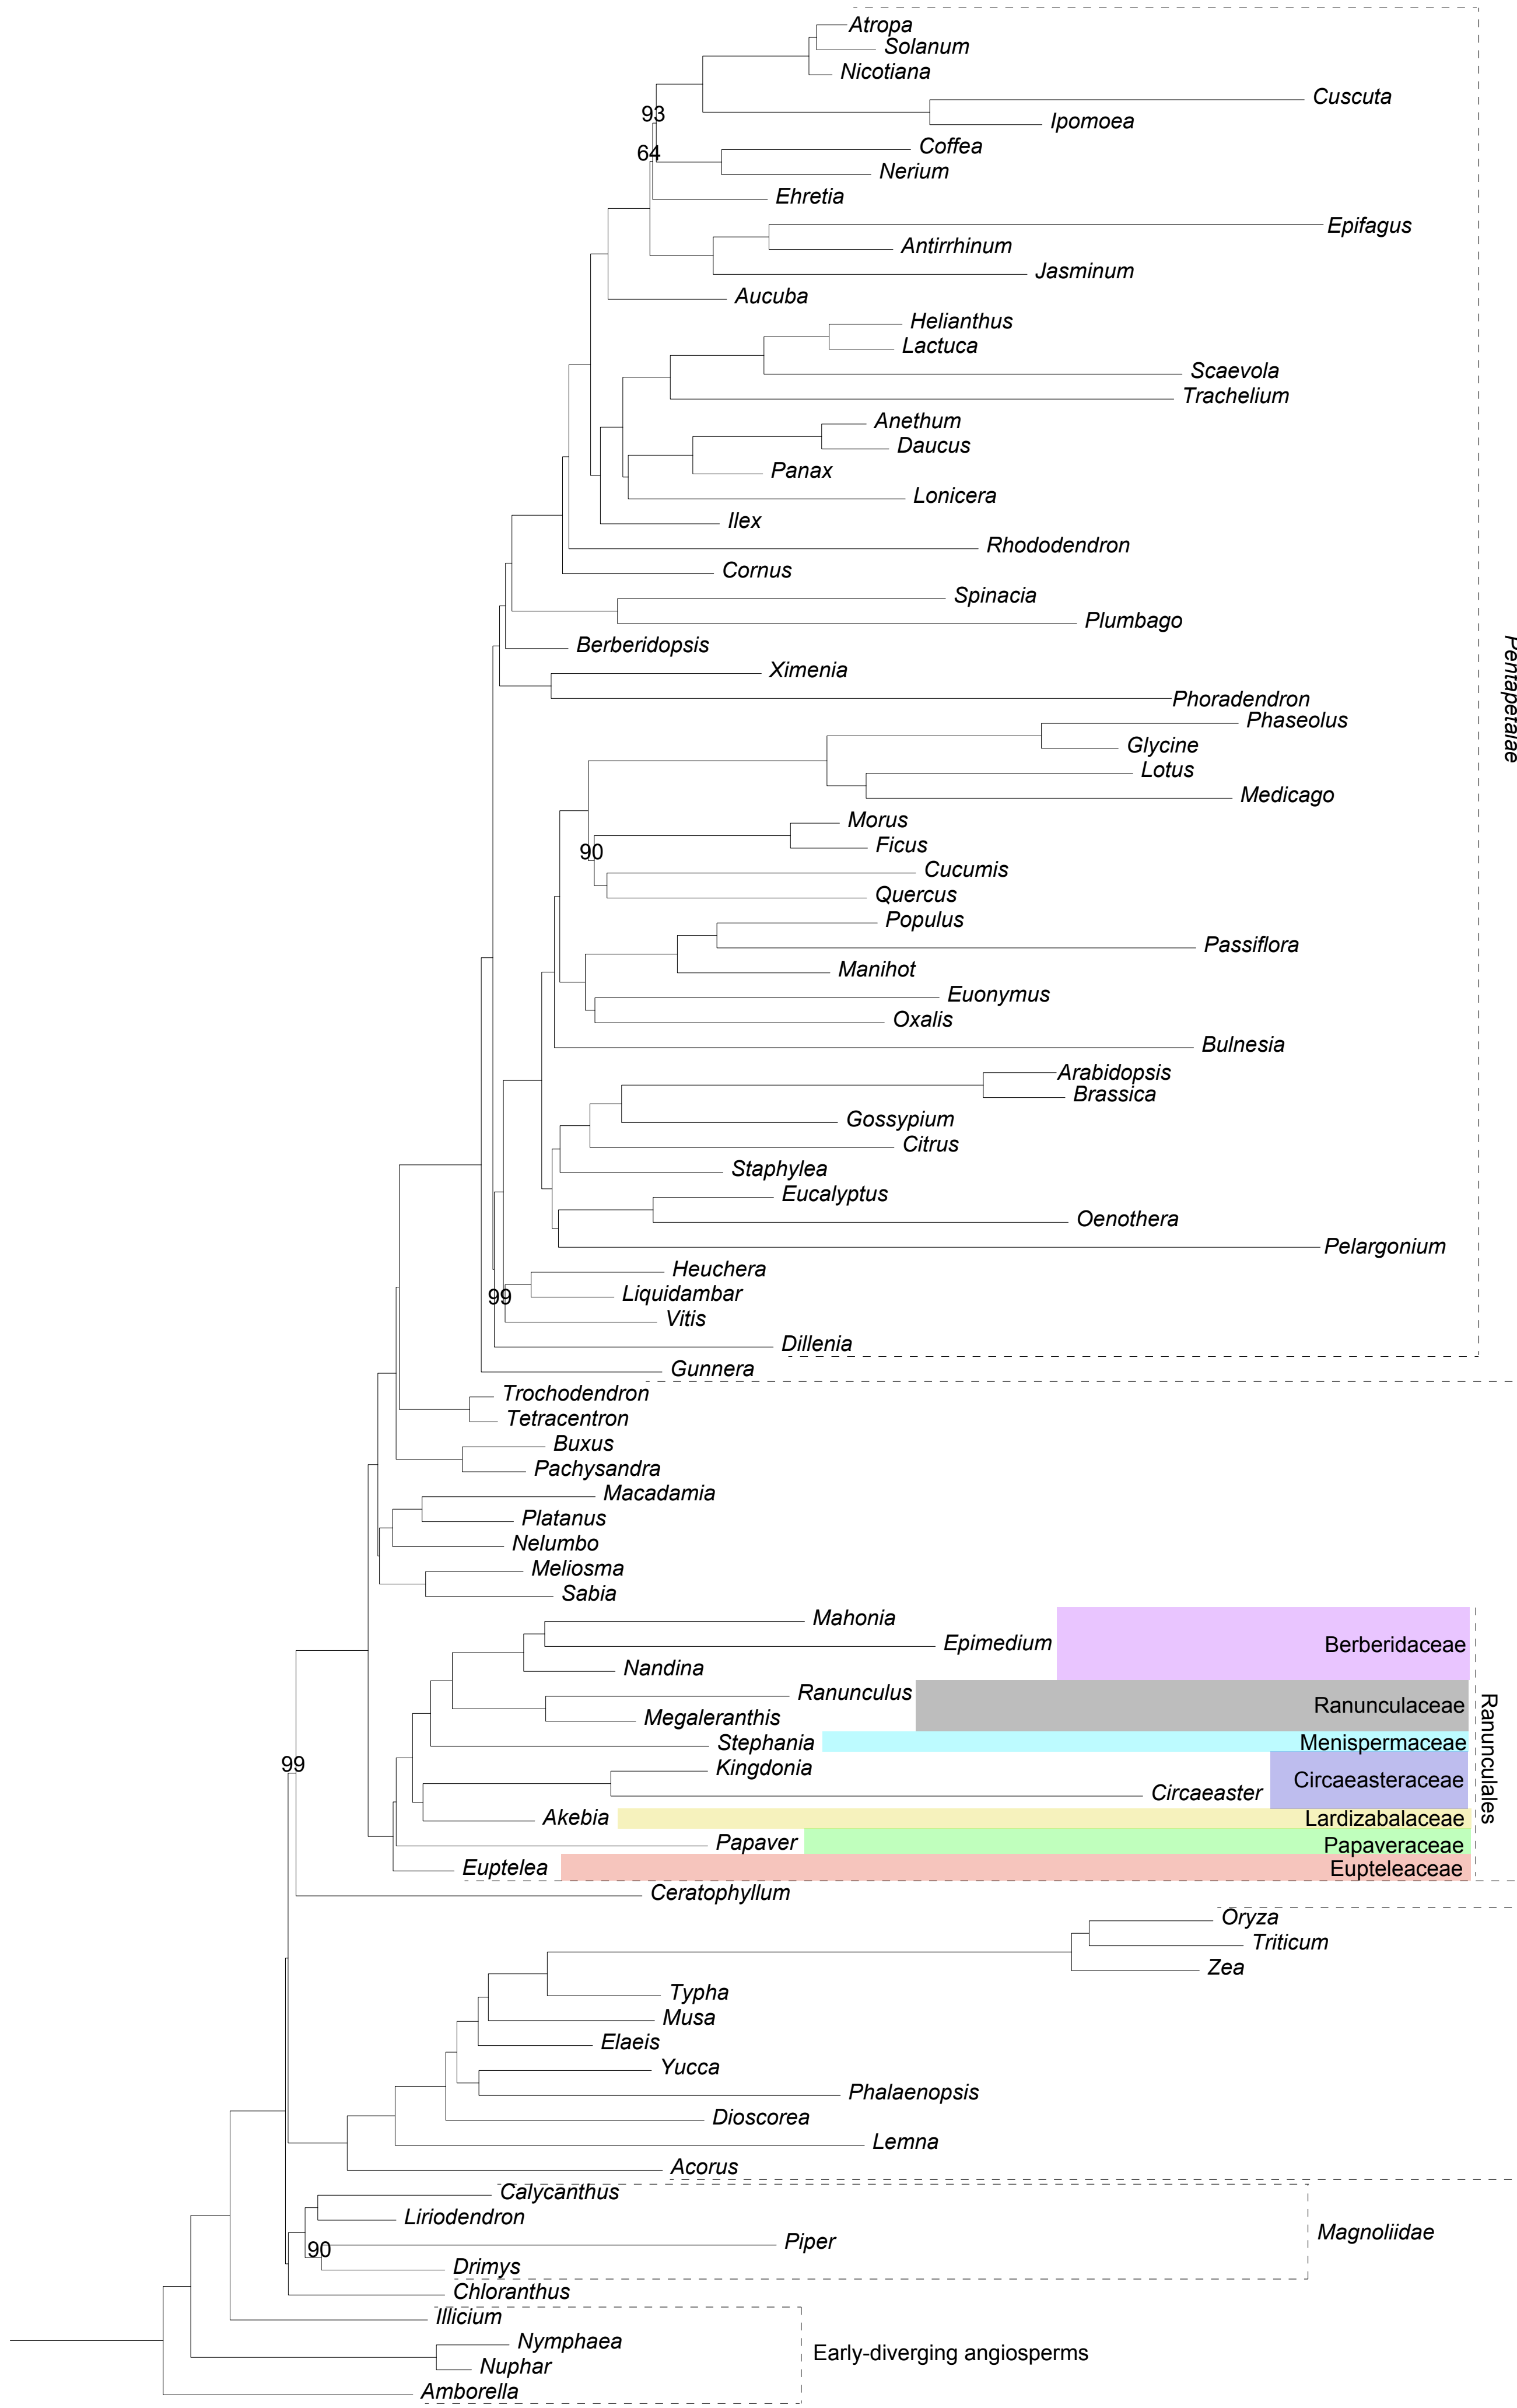

Pentapetales

Early-diverging eudicots

Ranunculales

Monocotyledoneae

Magnoliidae

Early-diverging angiosperms

0.06

*Atropa*  
*Solanum*  
*Nicotiana*

*Ipomoea* — *Cuscuta*

93  
64  
*Coffea*  
*Nerium*

*Ehretia* — *Epifagus*

*Antirrhinum* — *Jasminum*

*Aucuba* — *Helianthus*  
*Lactuca*

*Scaevola*  
*Trachelium*

*Anethum*  
*Daucus*

*Panax* — *Lonicera*

*Ilex* — *Rhododendron*

*Cornus* — *Spinacia*

*Plumbago*

*Berberidopsis* — *Ximenia*

*Phoradendron*  
*Phaseolus*

*Glycine*  
*Lotus*

*Medicago*

90  
*Morus*  
*Ficus*

*Cucumis* — *Quercus*

*Populus* — *Passiflora*

*Manihot* — *Euonymus*

*Oxalis* — *Bulnesia*

*Arabidopsis*  
*Brassica*

*Gossypium* — *Citrus*

*Staphylea* — *Eucalyptus*

*Oenothera* — *Pelargonium*

99  
*Heuchera*  
*Liquidambar*  
*Vitis*

*Dillenia* — *Gunnera*

*Trochodendron* — *Tetracentron*

*Buxus* — *Pachysandra*

*Macadamia* — *Platanus*

*Nelumbo* — *Meliosma*

*Sabia* — *Mahonia*

*Epimedium* — *Berberidaceae*

*Nandina* — *Ranunculus*

*Ranunculaceae*

*Megaleranthis* — *Stephania*

*Menispermaceae*

*Kingdonia* — *Circaeaster*

*Circaeasteraceae*

99  
*Akebia* — *Papaver*

*Lardizabalaceae*  
*Papaveraceae*  
*Eupteleaceae*

*Euptelea* — *Ceratophyllum*

*Oryza*  
*Triticum*

*Zea*

*Typha* — *Musa*

*Elaeis* — *Yucca*

*Phalaenopsis* — *Dioscorea*

*Lemna* — *Acorus*

*Calycanthus* — *Liriodendron*

90  
*Drimys* — *Chloranthus*

*Illicium* — *Nymphaea*

*Nuphar* — *Amborella*
